# Supplementary material for: A new fluorescent probe for sensing Al3+ ions in the solution phase and CH3COO− in the solid state with aggregation induced emission (AIE) activity
Source: Royal Society of Chemistry journal article supplement (doi:10.1039/d2ra06978d), 2023-01-01
Supplement: d2ra06978d1.pdf [file d2ra06978d1.pdf]

**A new fluorescent probe for Al<sup>3+</sup> ion sensing in solution phase and CH<sub>3</sub>COO<sup>-</sup> in solid state with aggregation induced emission (AIE) activity**

*Rahul Bhowmick, Payel Mondal and Pabitra Chattopadhyay\**

*Department of Chemistry, The University of Burdwan, Golapbag, Burdwan-713104, West Bengal, INDIA*

**Supporting Information**

**CONTENTS**

1. **Figure S1.** <sup>1</sup>H NMR of **DFP-AMQ** in DMSO-d<sub>6</sub>.
2. **Figure S2.** Mass spectra of **DFP-AMQ**.
3. **Figure S3.** FTIR spectra of **DFP-AMQ**.
4. **Figure S4.** <sup>1</sup>H NMR of [**DFP-AMQ-Al**]<sup>+</sup> in DMSO-d<sub>6</sub>.
5. **Figure S5.** Mass spectra of [**DFP-AMQ-Al**]<sup>+</sup>.
6. **Figure S6.** FTIR spectra of [**DFP-AMQ-Al**]<sup>+</sup>.
7. **Figure S7.** Job's plot for the determination of the composition of the **DFP-AMQ-Al<sup>3+</sup>** complex.
8. **Figure S8.** Fluorescence emission of **DFP-AMQ** (20 μM) induced by different cations.
9. **Figure S9.** Reversibility study by EDTA.
10. **Figure S10.** Limit of detection.
11. **Figure S11.** pH dependence of the FIs of **DFP-AMQ** and **DFP-AMQ-Al<sup>3+</sup>** complex.
12. **Figure S12.** Dynamic light scattering (DLS) study of **DFP-AMQ-Al<sup>3+</sup>** with different percentages of H<sub>2</sub>O: (A) 0% , (B) 20% and (C) 50% and shows the average size (A) 204.04 nm, 297.41 nm and 315.27 nm.
13. **Figure S13.** Fluorescence emission of **DFP-AMQ** with NO<sub>3</sub><sup>-</sup> and both NO<sub>3</sub><sup>-</sup> with other anions in solid state (at λ<sub>ex</sub> = 450 nm).
14. **Figure S14.** Lifetime measurement of the probe **DFP-AMQ** in CH<sub>3</sub>CN and in CH<sub>3</sub>CN-H<sub>2</sub>O (9:1,v/v) medium and **DFP-AMQ-Al<sup>3+</sup>** in CH<sub>3</sub>CN-H<sub>2</sub>O (9:1,v/v) medium.

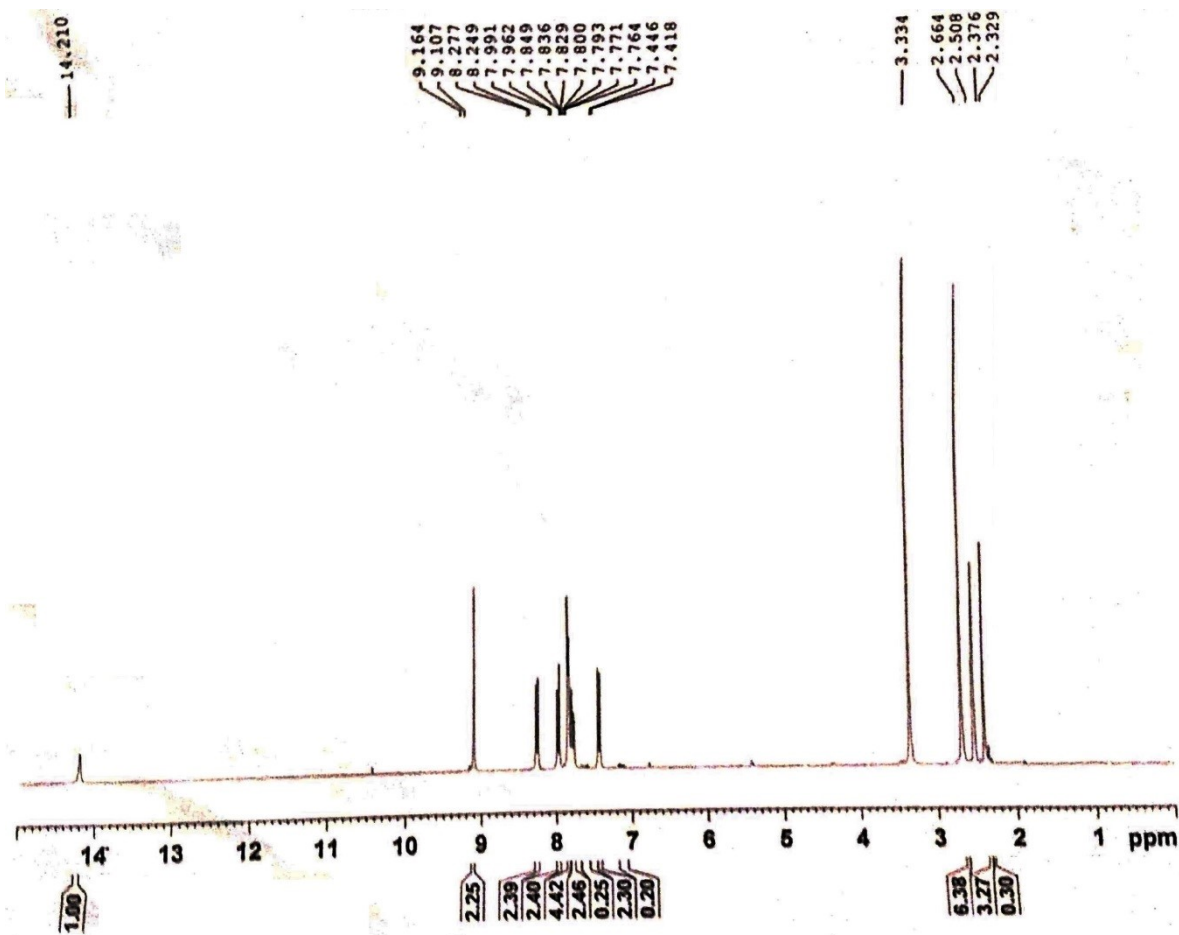

Figure S1.  $^1\text{H}$  NMR of DFP-AMQ in  $\text{DMSO-d}_6$ .

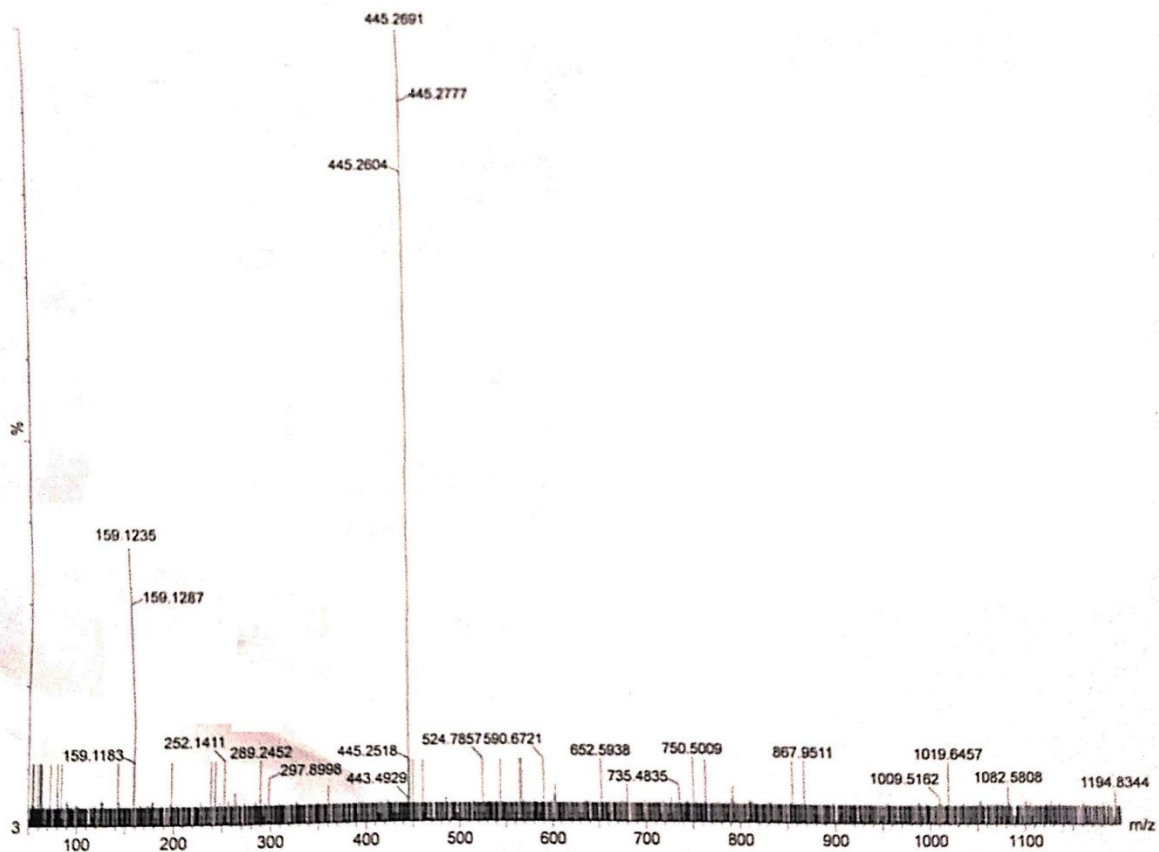

Figure S2. Mass spectra of DFP-AMQ.

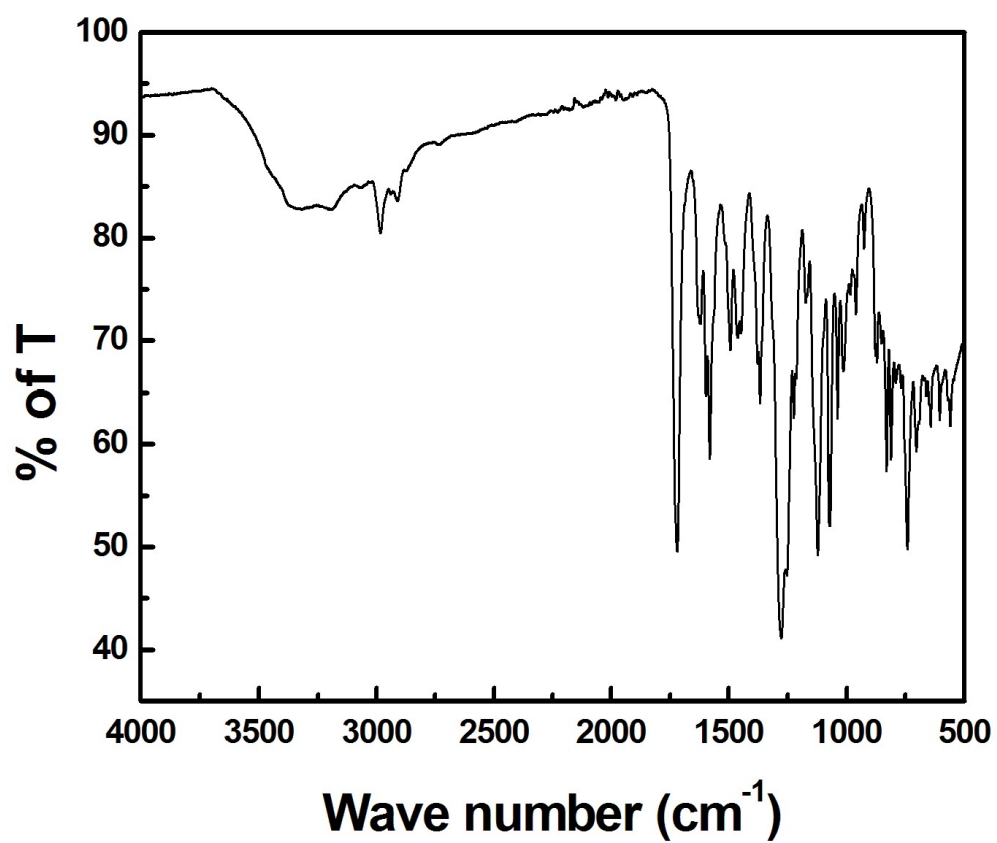

**Figure S3.** FTIR spectra of DFP-AMQ.

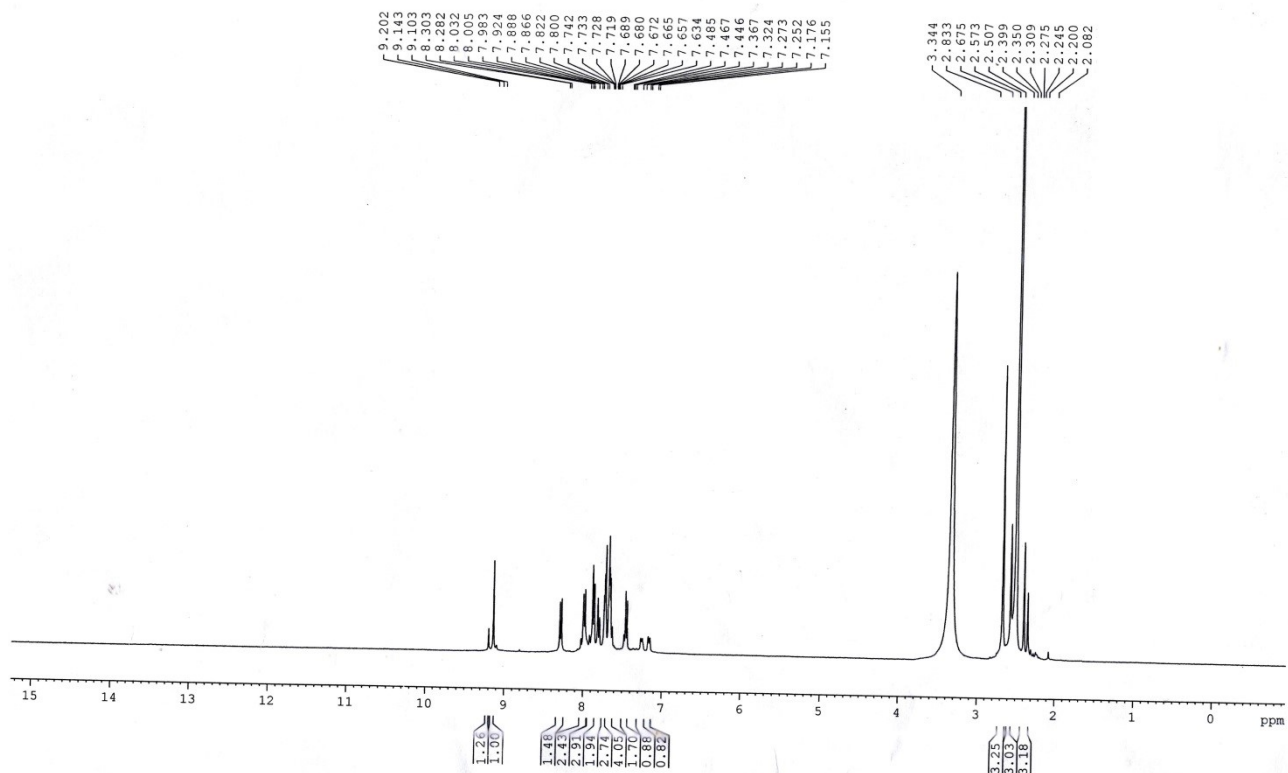

**Figure S4.**  $^1\text{H}$  NMR of  $[\text{DFP-AMQ-Al}]^+$  in  $\text{DMSO-d}_6$ .

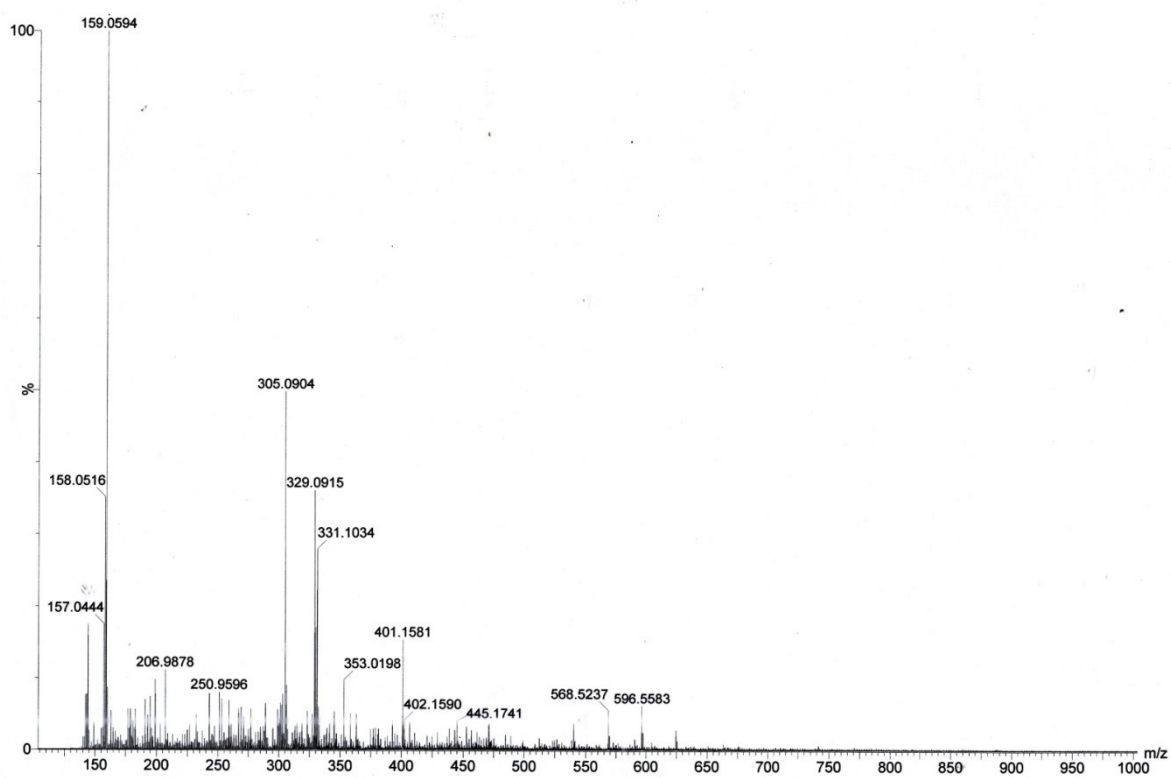

**Figure S5.** Mass spectra of [DFP-AMQ-AI]<sup>+</sup>.

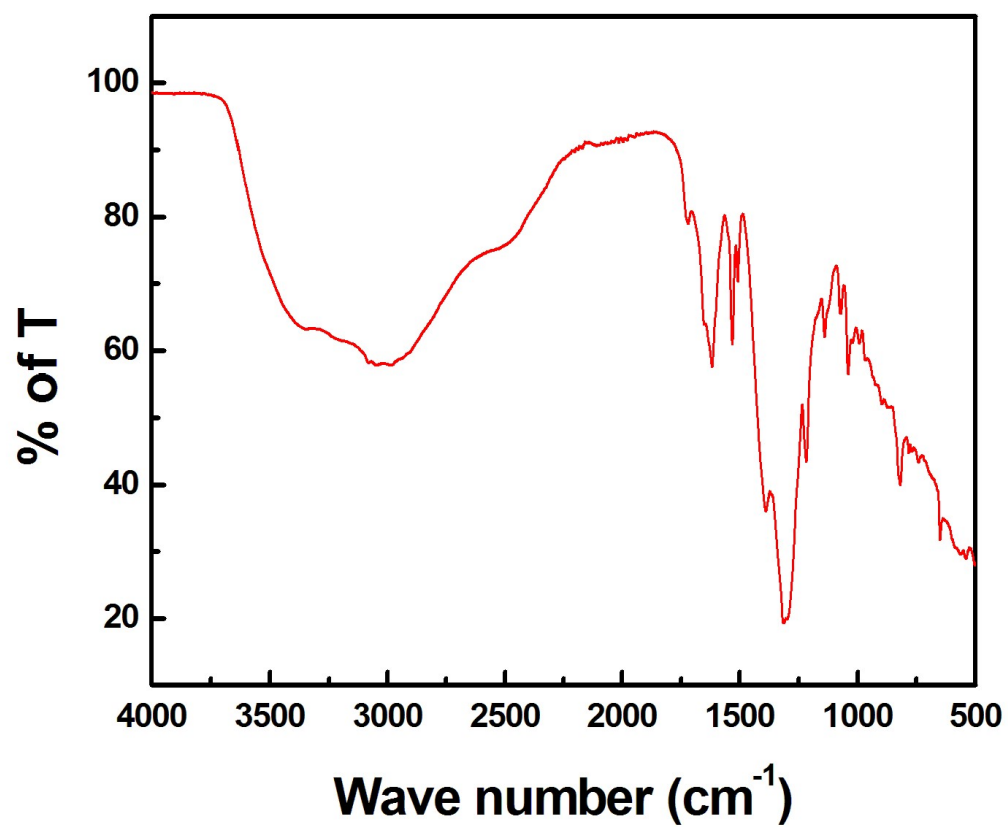

**Figure S6.** FTIR spectra of [DFP-AMQ-Al]<sup>+</sup>.

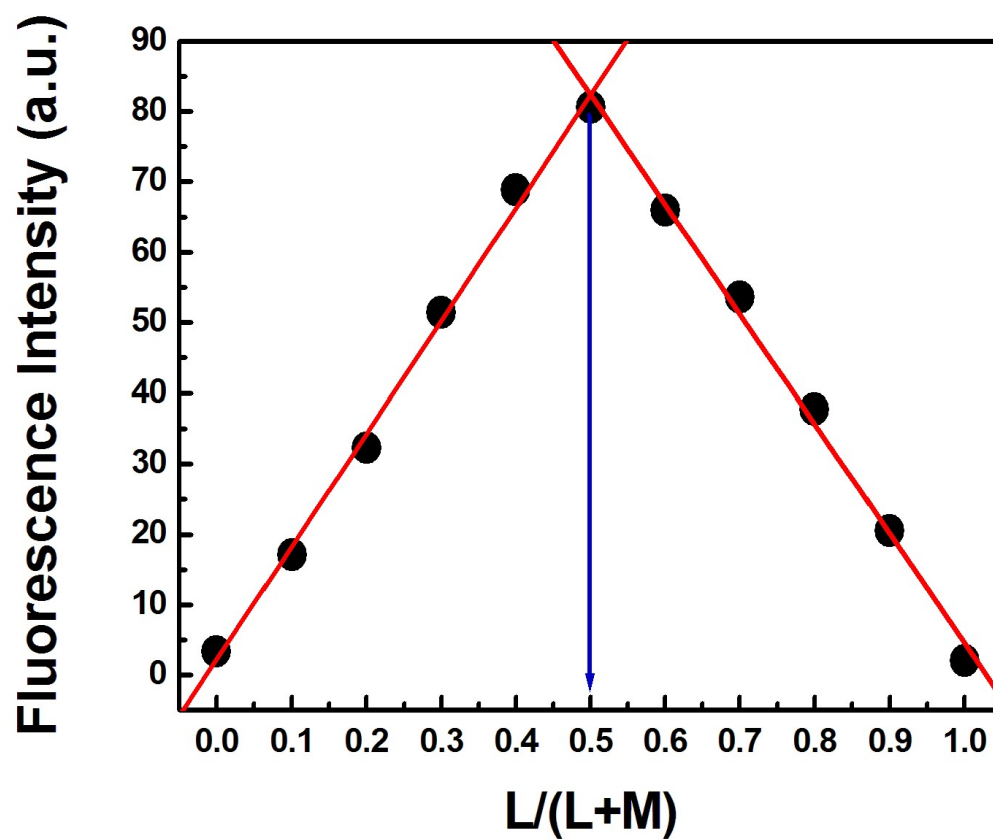

**Figure S7.** Job's plot for the determination of the composition of the DFP-AMQ-Al<sup>3+</sup> complex.



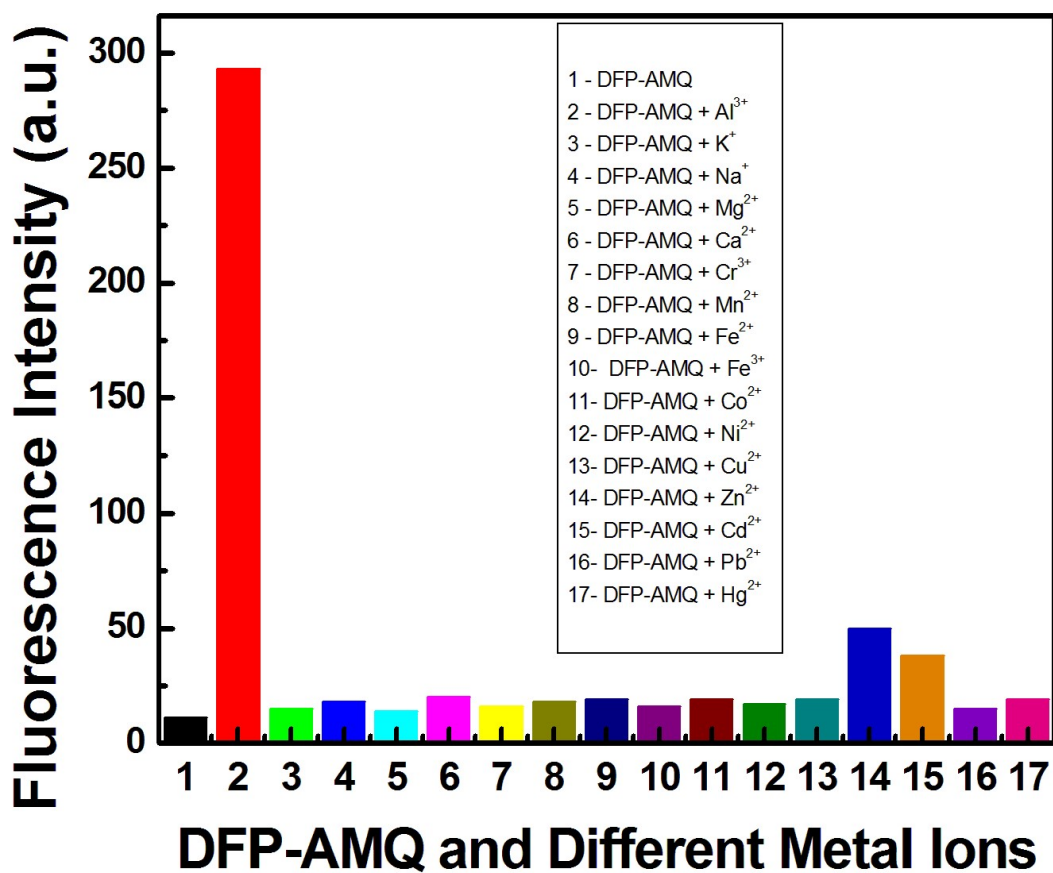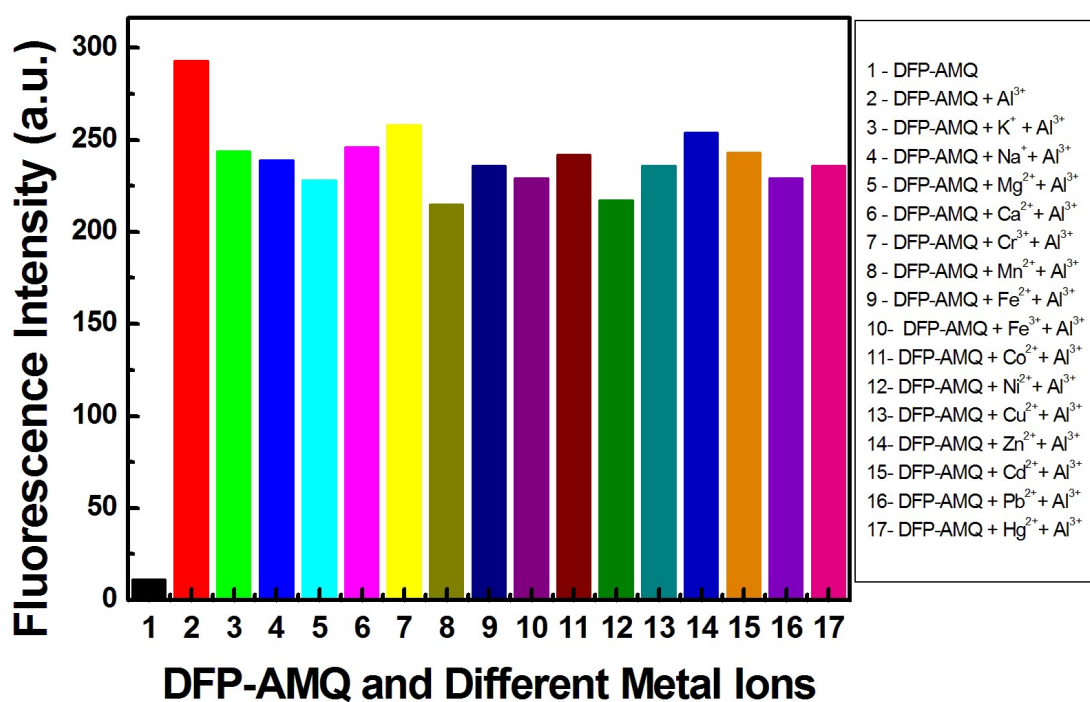

**Figure S8.** Fluorescence emission of DFP-AMQ (20 μM) induced by different cations (100 μM)

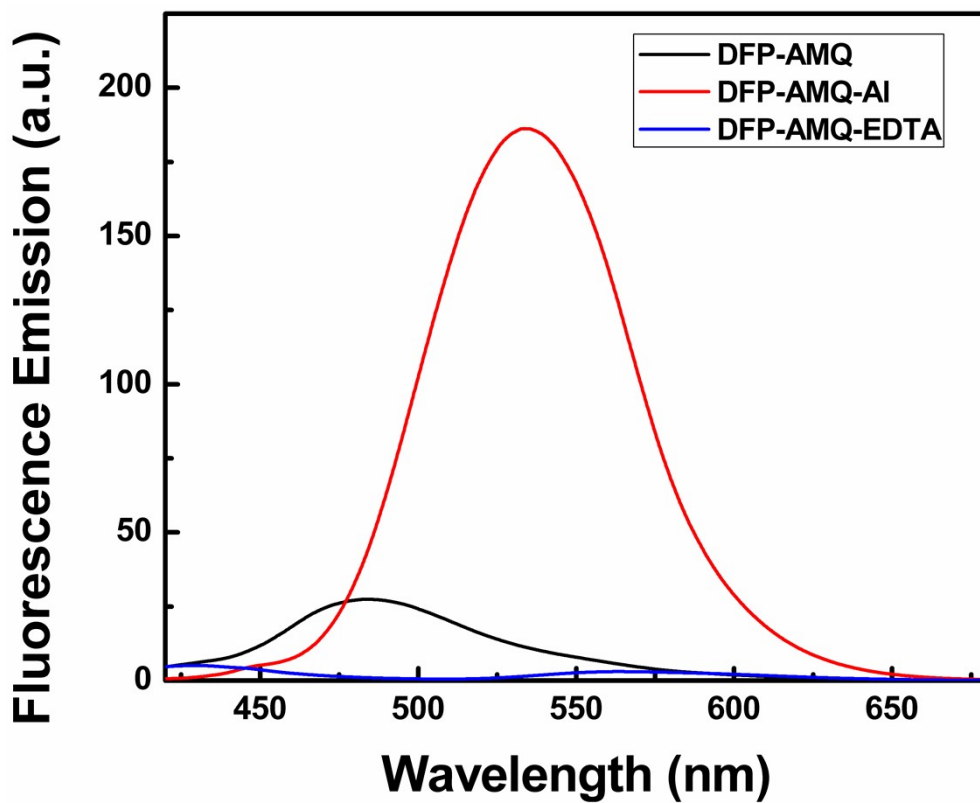

Figure S9. Reversibility study by EDTA.

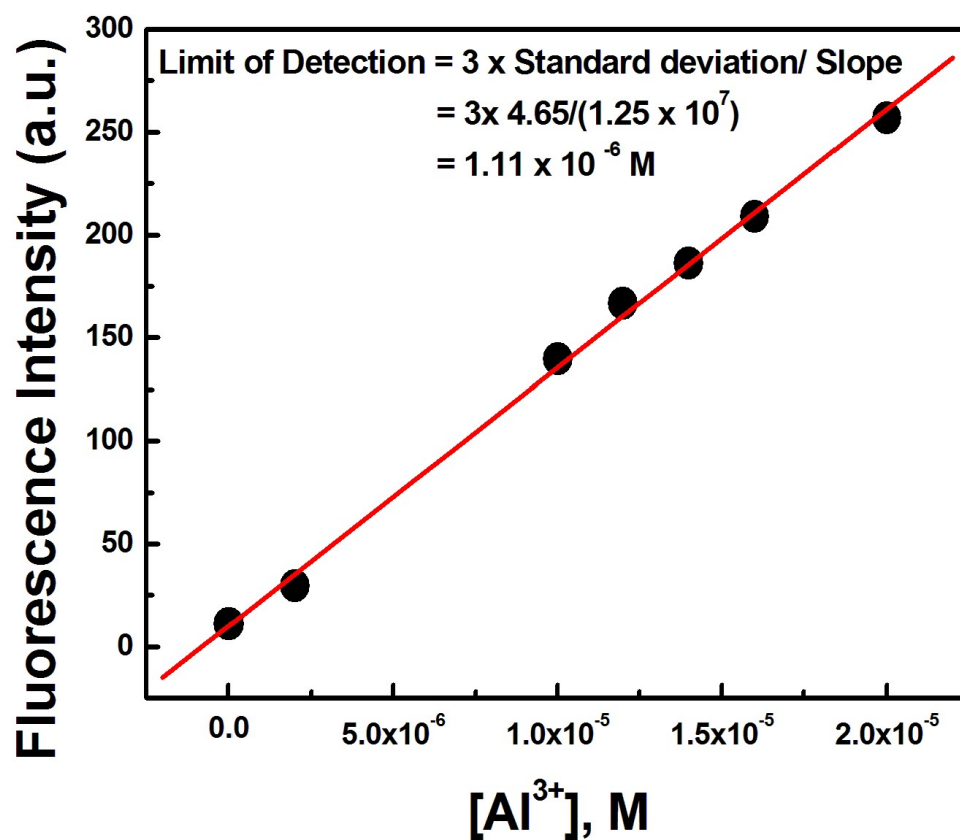

Figure S10. Limit of detection of Al<sup>3+</sup>.

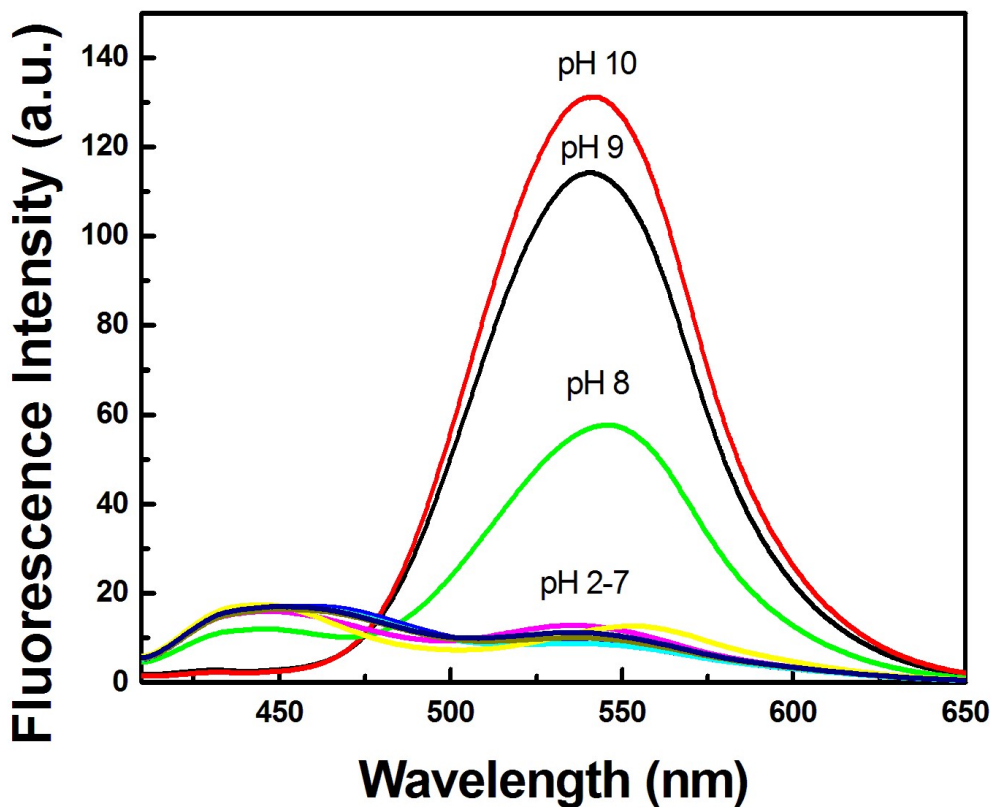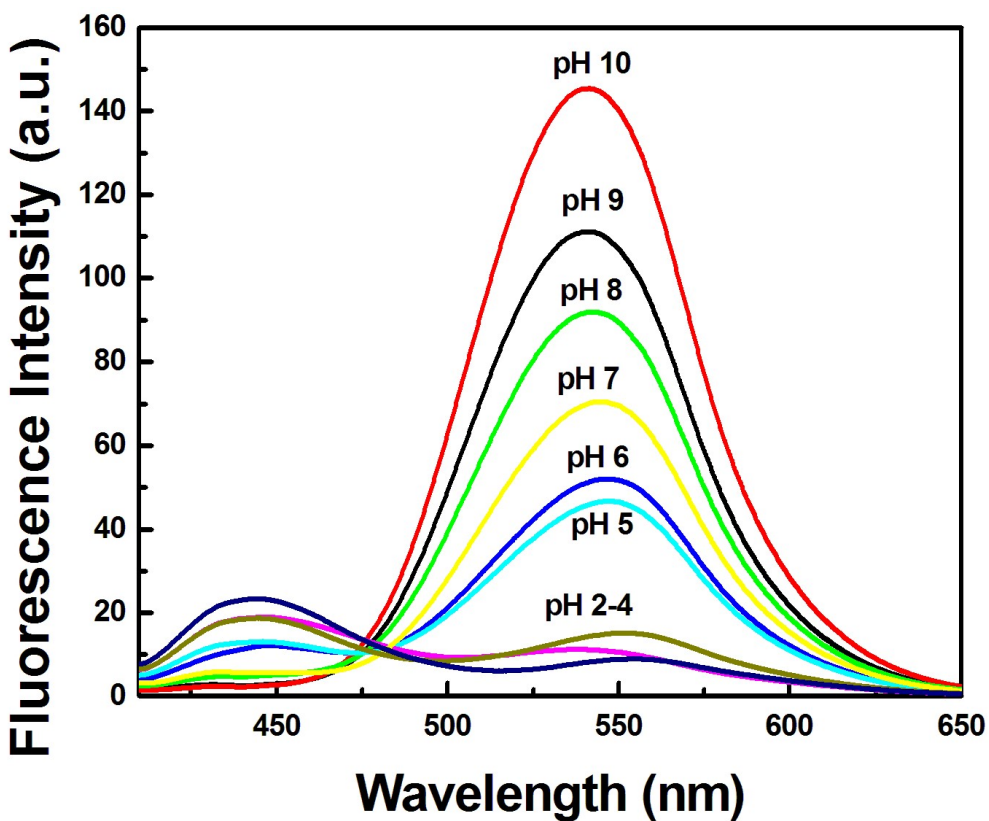

Figure S11. pH dependence of the FIs of the free ligand DFP-AMQ (above) and the DFP-AMQ-Al<sup>3+</sup> complex (below).

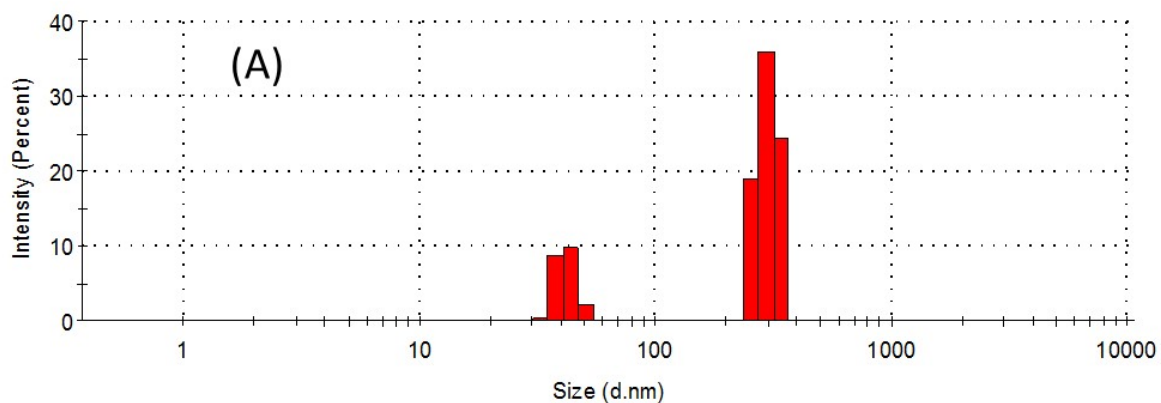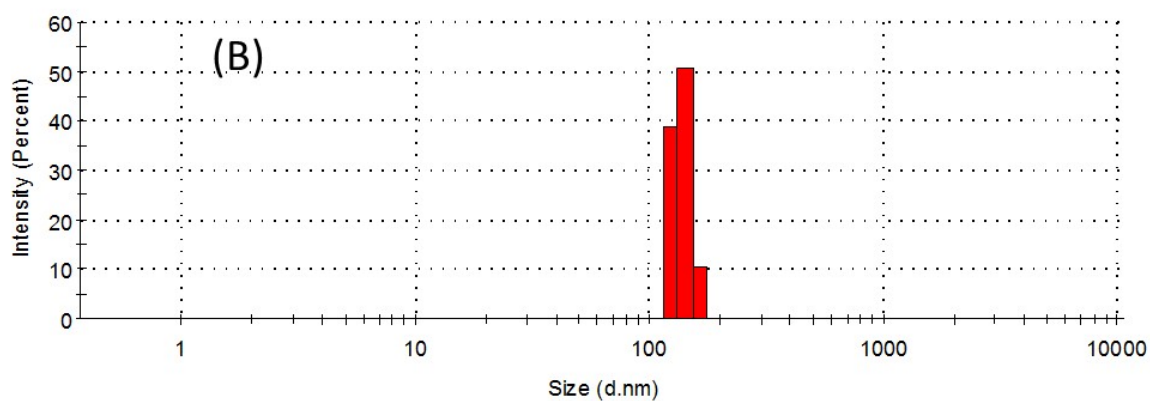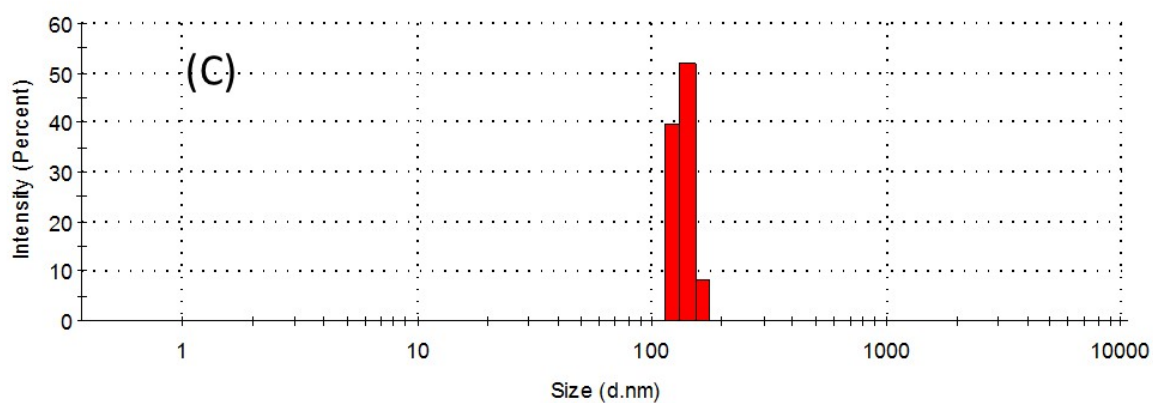

**Figure S12.** Dynamic light scattering (DLS) study of **DFP-AMQ-Al<sup>3+</sup>** with different percentages of H<sub>2</sub>O: (A) 0% , (B) 20% and (C) 50% and shows the average size (A) 204.04 nm, 297.41 nm and 315.27 nm.

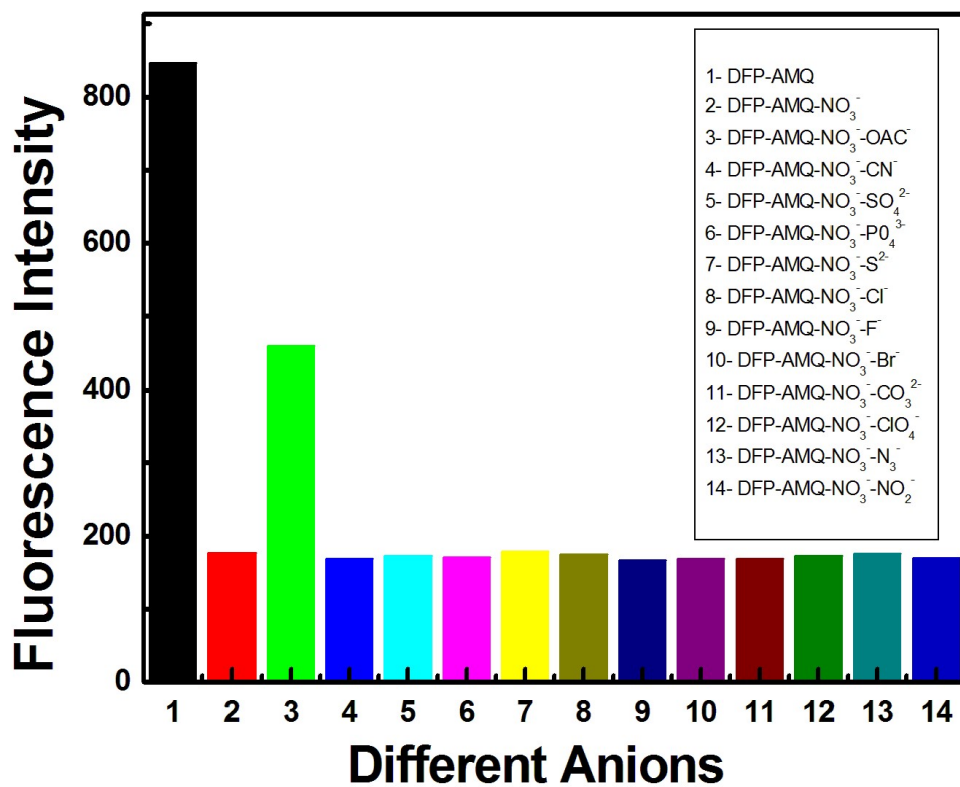

**Figure S13.** Fluorescence emission of DFP-AMQ with NO<sub>3</sub><sup>-</sup> and both NO<sub>3</sub><sup>-</sup> with other anions in solid state (at  $\lambda_{ex} = 450$  nm).

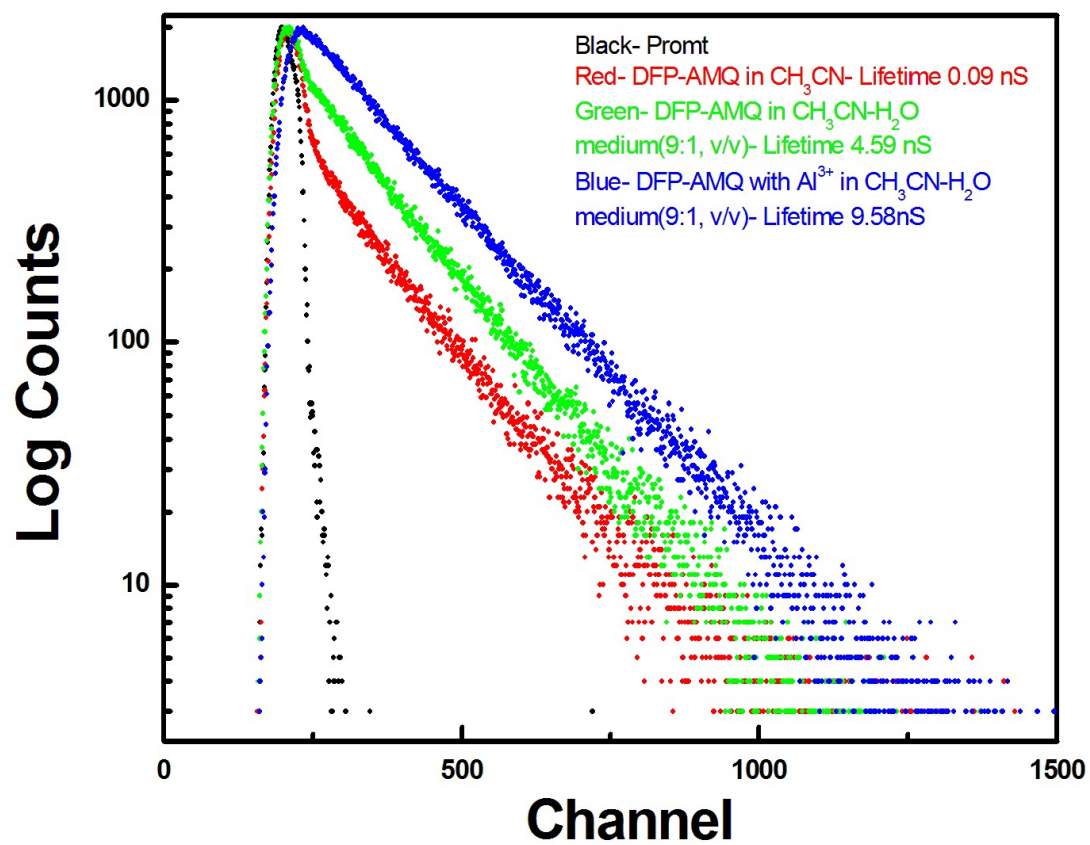

**Figure S14.** Lifetime measurement of the probe DFP-AMQ in  $\text{CH}_3\text{CN}$  and in  $\text{CH}_3\text{CN-H}_2\text{O}$  (9:1,v/v) medium and DFP-AMQ- $\text{Al}^{3+}$  in  $\text{CH}_3\text{CN-H}_2\text{O}$  (9:1,v/v) medium.
